# Supplementary material for: Crystal Structure of a Charge Engineered Human Lysozyme Having Enhanced Bactericidal Activity
Source: PubMed Central journal article supplement (PMC3049763; doi:10.1371/journal.pone.0016788), 2011-03-07
Supplement: pone.0016788.s001.pdf [file pone.0016788.s001.pdf]

10 20 30 40 50 60 70 80 90 100 110 120 130  
KVFERCELARTLKRLGMDGYRGISLANWMLAKWESGYNTRATNYNAGDRSTDYGFQINSRYWCNDGKTPGAVNACHLSCSALLQDNIADAVACAKRVVROPOGIRAWVAWRNRCONRDVROYYVQCGV  
.RM...F.RI.Q.HL.HQ...V.Q...FD.K...P.Q...L.H.D...H.A.E.KVR.E.QE.DLVK.N.KI...Q...K.EGK.LSK.LE...--  
.Y...AAM...L.N...Y.G.V.A.Y.NF.Q...R.T-G...LE...W...K.V.GIP.V.RSD.TE.K...I.S.GN.MN...KGT..SRWIR...--  
.TY...AM...L...W.Y.GH.V.A.Y.NF.G...P.Q...L...W...RTK...KIQ.RE.TAD.TAS.N...N.MG...TKN.KG...SPWIRD..L  
.IY.Q.A.EM...L...D.Y.GD.V.T.H.NF.G...R.Q...W...N.K...GIE.E.KAD.TA.I...N.MG...TKY.KGK..S.WIK...--  
.IY.Q...EF.H...H.Y.GD.V.T.H.NF.A...R.Q...L...W...K.K...GIE.E.KAD.TA.N...I...N.MG...TKY.KGK..S.WIKD...--  
...E.L.K.V...L.T...S.K...P.SE...KW.D...N.DG.VA.E.MEN.DK.T...QI.E...T...KSH.RGH..SS.E...--  
...E.L.K.V...L.T...S.K...P.SE...KF...N.DG.V.E.MEN.K...QI.SE...T...KSH.RDH..SS.E...--  
...E.L.K.V...L.T...S.K...P.SE...KW...N.DG.V...E.MEN...K...HI.SE...T...KSH.RDH..SS.E.SL  
...K.L.K.V...L.T...S.K...P.SE...KW...N.DG.V...E.MEND.K...QI.SE...T...KSH.RDH..SS.E...--  
...K.L.K.V...L.T...S.K...PSSE...KW...N.DG.V...E.MEND.K...HI.SE...T...KSH.RDH..SS...--  
...K.L.K.V...L.T...S.K...PSSE...KW...N.DG.V...RE.MEND.K...HI.SE...T...KSH.RDH..SS.E...--  
...K.L.K.V...L.T...S.K...PSSE...KW...N.DG.V...E.MEND.K...HI.SE...T...KSH.RDH..SS.E...--  
...K.L.D.K.V...L.S...K...P.SE...KW...N.DG.V...MEND.EK...HI.SE...T...KSH.RVH..SS.E...--  
...K.L.D.K.V...L.T...K...P.SE...KF...D.DG.V...E.MEND.EK...HI.SE...T...KSH.RDH..SS.E...--  
.YD.F.I.KS...V...V...NF.K...P.SQ...K...I.KV.D.DLSQDIE...K...KAH...K.S.IR...--  
.YD.F.I.KS...V...V...DF.K.I.R.V.--K...I.KV.D.DLSQDIE...K...TH...K.S.IR...--  
.YD.F.I.KS...V...V...DF.K.I.H.V.--K...I.KV.D.DLSQDIE...L.VK...AH...K.S.IR...--  
.T.K...K.N.LA.K.V...G.N...Q.K...P.SK...KW...K.G.GV...K.D.TQ...KI.SQ...T...K.K.R...LTS.K...  
.K.K...R.Y.L.K.V...TYG.R...V...P.SK...KW...K.G.GV...M.K.D.TQ...TI.SR...T...K.K.R...SS.IR...--  
.W.A...K.E...V...T...D...D...PSSE...N...H...G.GIN.NV.E.D.TK.Q...V...K.H.EGH..E..E...--  
..KH...I.RSSALA...V.E...M.OH.NFD.E.I...ST.Q...R...GIP...D.TQ.IQ...QRH...LSG.IRN...  
.IY.QF...N.S.Y.V...D.V...QH.N.Q.R...P.Q...R.K...GIP...D.TQ.IQ...QRH.K...LSG.IRN...  
.Y...F...N.A.Y.V...D.V...QH.N...R.Q...R...GIN...D.TA.IQ...AH...LS.IRN...  
.YN...I.N...VK.D.V...QH.N...R...RSK.GIN...D.TA.IQ...TQ...LS.IRN...  
.K.Q...K.L...V...V...R.N...R.K...W...K...RIP...K.D.TQ...K...K...L.S...R...  
...F.F...R.S.Q...S...HW...IP...D.TQ...S...SH...Q.LTS.I...  
...S.F.NF...R.N.Q...Q...HW...P.G...D.TQ...S...SH...Q.LTS.I...  
...P...N...L.I...  
I...K.L.K.V...V...D...P.E...N...I.N.N...S...KKH...S.E...  
I...K.L.K.V...V...E...P.E...N...D.I...N...S...V...H...K.S.K...  
I...K.L.K.V...V...E...P.E...N...D.I...N...S...H...S.K...  
I...K.L.K.V...V...E...P.E...N...D.I...N...S...H...K.S.K...  
...D...P.Q...H...N.R...I.N...D.TQ...KAH...S...  
...D...P.Q...H...N.R...I.N...D.TE...KAH...S.I...  
...F.L...D...P.Q...H...N.R...I.N...D.TE...KAH...S...  
I...L...V...D.Q...P.Q...H...N...RI.N...T...H...S...  
I...L...V...D.Q...P.Q...H...N...I.N...T...H.H...S...  
I...L...V...D.Q...P.Q...H...N...I.N...T...S...H...S...  
I...L...V...N.Q...P.Q...H...N...I.N...T...S...H...S...  
I...L...V...Q...P.Q...H...N...I.N...T...S...H...S...  
.IY...K.L.K.V...S...P.K...R...IP.D.K.D.TQ...S...H...Q.LTP.IR...  
I...N.LA.K.V...V...N...P.SK...R...I...D.TQ...S...N...AH.E...S...RN...  
...D...LA.FK.V...D.K...P.S...R...S.IP.D.K.D.TQ...S...N...AH.E.Q.S...RN...  
I...D...LA.FK.V...N.K...P.S...R...IP.D.K.D.TQ...S...N...AH.E.Q.S...RN...  
.YD...A.AS...A.N.P.V.S...S.Q...R.T-G...D.R...K.V.GIR.Q.TADLTV.IR...L.N.G...LH...Q.L.S.A...  
...Q...W.V.AR...D.V.S...Q...N.I.H.T-G...W...DRI-TR...NIK...QT.DVTV.IN...S...NRH...LSA.IA...L  
...W.L.N.SN...D.V.SQ...S...R.T-G...W.DN.Q.TS-GI...T.DVGA.II.H...N.G...KRH...GQ.LSS.A...L  
R.Y...W.L.RNQ...V.TE.H...H.T-G...W...SQ.TS-...NIR.E.T.DVIV.IK...N.G...QH...GQ.LSS.LA...L
